# Supplementary material for: Unlocking archival maps of the Hornsund fjord area for monitoring glaciers of the Sørkapp Land peninsula, Svalbard
Source: Copernicus journal article supplement (doi:10.5194/essd-15-3869-2023), 2023-09-01
Supplement: Supplementary file 1 [file essd-15-3869-2023-supplement.pdf]

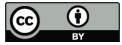

*Supplement of*

## **Unlocking archival maps of the Hornsund fjord area for monitoring glaciers of the Sørkapp Land peninsula, Svalbard**

**Justyna Dudek and Michał Pełlicki**

*Correspondence to:* Justyna Dudek ([justyna\\_dudek@wp.pl](mailto:justyna_dudek@wp.pl))

The copyright of individual parts of the supplement might differ from the article licence.

Supplement table showing the difference in the position of the elevation points presented on the maps IGF PAN (column x1. y1) and NPI map (columns x2. y2)

| Sheet no. | x1        | y1         | x2        | y2         | x1-x2 (m) | y1-y2 (m) |
|-----------|-----------|------------|-----------|------------|-----------|-----------|
| 5         | 529714.68 | 8541165.53 | 529720.67 | 8541148.32 | -5.99     | 17.21     |
| 5         | 529573.21 | 8542303.38 | 529587.59 | 8542285.33 | -14.38    | 18.05     |
| 5         | 529498.10 | 8542842.50 | 529514.71 | 8542825.65 | -16.61    | 16.85     |
| 5         | 526421.41 | 8541145.52 | 526423.46 | 8541151.80 | -2.05     | -6.28     |
| 5         | 524663.83 | 8541293.80 | 524648.47 | 8541302.51 | 15.37     | -8.71     |
| 5         | 525000.58 | 8542303.45 | 525006.00 | 8542324.07 | -5.41     | -20.62    |
| 5         | 524485.60 | 8540113.11 | 524478.21 | 8540140.36 | 7.39      | -27.25    |
| 5         | 522255.19 | 8540073.77 | 522241.62 | 8540085.36 | 13.57     | -11.59    |
| 5         | 519680.71 | 8540790.92 | 519669.94 | 8540816.02 | 10.77     | -25.10    |
| 5         | 519148.85 | 8541016.3  | 519141.97 | 8541039.87 | 6.88      | -23.57    |
| 5         | 527619.28 | 8543102.04 | 527634.08 | 8543096.19 | -14.80    | 5.84      |
| 5         | 523672.90 | 8542516.26 | 523664.30 | 8542532.55 | 8.60      | -16.29    |
| 5         | 527563.54 | 8542924.17 | 527573.84 | 8542918.20 | -10.30    | 5.97      |
| 5         | 527890.04 | 8542074.45 | 527897.01 | 8542072.08 | -6.97     | 2.37      |
| 5         | 528637.67 | 8539816.42 | 528627.46 | 8539815.66 | 10.21     | 0.76      |
| 5         | 529589.76 | 8540088.77 | 529582.90 | 8540076.56 | 6.86      | 12.21     |
| 5         | 529249.88 | 8540044.39 | 529246.42 | 8540039.61 | 3.46      | 4.78      |
| 5         | 528003.09 | 8541480.94 | 528008.23 | 8541476.97 | -5.14     | 3.97      |
| 6         | 537220.26 | 8539855.95 | 537202.76 | 8539839.74 | 17.50     | 16.21     |
| 6         | 543593.56 | 8549258.84 | 543591.48 | 8549275.28 | 2.08      | -16.44    |
| 6         | 541850.00 | 8542973.00 | 541865.29 | 8542964.5  | -15.29    | 8.50      |
| 6         | 534893.00 | 8543920.00 | 534876.59 | 8543914.23 | 16.41     | 5.77      |
| 6         | 538186.5  | 8542496.56 | 538184.5  | 8542491.56 | 2.00      | 5.00      |
| 6         | 541472.53 | 8540027.04 | 541485.48 | 8539994.6  | -12.95    | 32.44     |
| 6         | 546274.53 | 8548036.64 | 546302.90 | 8548050.58 | -28.37    | -13.94    |
| 6         | 546611.31 | 8547372.14 | 546649.36 | 8547373.83 | -38.05    | -1.69     |
| 6         | 546007.53 | 8549460.87 | 546037.34 | 8549481.09 | -29.81    | -20.22    |
| 6         | 542531.11 | 8549249.80 | 542520.07 | 8549258.89 | 11.04     | -9.09     |
| 6         | 533283.47 | 8549700.32 | 533277.47 | 8549699.32 | 6.00      | 1.00      |
| 6         | 545740.00 | 8549715.00 | 545767.00 | 8549735.00 | -27.00    | -20.00    |
| 6         | 533283.47 | 8549700.32 | 533277.47 | 8549699.32 | 6.00      | 1.00      |
| 6         | 537259.40 | 8544036.23 | 537249.4  | 8544033.23 | 10.00     | 3.00      |
| 6         | 534523.32 | 8548347.70 | 534512.32 | 8548339.70 | 11.00     | 8.00      |
| 6         | 533931.03 | 8547776.37 | 533925.03 | 8547780.37 | 6.00      | -4.00     |
| 6         | 532233.67 | 8549171.72 | 532227.67 | 8549174.72 | 6.00      | -3.00     |
| 6         | 543184.04 | 8542396.31 | 543216.77 | 8542386.52 | -32.73    | 9.79      |
| 6         | 535986.17 | 8544281.65 | 535961.06 | 8544289.35 | 25.11     | -7.70     |
| 6         | 537732.57 | 8541117.93 | 537721.54 | 8541095.24 | 11.03     | 22.69     |
| 6         | 546177.91 | 8548613.37 | 546208.71 | 8548641.76 | -30.80    | -28.39    |
| 6         | 545900.1  | 8548900.92 | 545930.26 | 8548904.50 | -30.16    | -3.58     |
| 6         | 543745.06 | 8548489.85 | 543753.04 | 8548500.83 | -7.97     | -10.98    |
| 6         | 536487.38 | 8543496.91 | 536479.83 | 8543490.32 | 7.55      | 6.59      |

|   |           |            |           |            |        |        |
|---|-----------|------------|-----------|------------|--------|--------|
| 6 | 545292.14 | 8540242.11 | 545337.75 | 8540227.01 | -45.61 | 15.10  |
| 6 | 543530.34 | 8543700.43 | 543562.1  | 8543706.34 | -31.76 | -5.91  |
| 6 | 541688.11 | 8545109.33 | 541688.14 | 8545118.39 | -0.03  | -9.06  |
| 6 | 544217.70 | 8548938.00 | 544231.5  | 8548952.85 | -13.80 | -14.85 |
| 6 | 533221.8  | 8542722.01 | 533196.43 | 8542723.16 | 25.37  | -1.15  |
| 6 | 533918.82 | 8541743.41 | 533893.79 | 8541742.82 | 25.03  | 0.59   |
| 6 | 534571.91 | 8540570.64 | 534548.75 | 8540564.03 | 23.16  | 6.61   |
| 6 | 537714.18 | 8540005.38 | 537702.3  | 8539994.11 | 11.88  | 11.27  |
| 6 | 537608.07 | 8541837.60 | 537596.91 | 8541828.04 | 11.16  | 9.56   |
| 6 | 537181.02 | 8542042.19 | 537170.37 | 8542034.87 | 10.65  | 7.32   |
| 8 | 529006.63 | 8538944.13 | 529030.31 | 8538943.99 | -23.68 | 0.14   |
| 8 | 526011.73 | 8536968.25 | 526017.51 | 8536964.61 | -5.78  | 3.64   |
| 8 | 524362.18 | 8534231.88 | 524359.26 | 8534228.28 | 2.92   | 3.60   |
| 8 | 529380.07 | 8534936.69 | 529400.57 | 8534926.38 | -20.50 | 10.31  |
| 8 | 515875.48 | 8535248.69 | 515875.36 | 8535243.17 | 0.12   | 5.52   |
| 8 | 519272.88 | 8531626.25 | 519256.6  | 8531628.67 | 16.28  | -2.42  |
| 8 | 517363.77 | 8532842.08 | 517346.07 | 8532847.50 | 17.70  | -5.42  |
| 8 | 516739.34 | 8533523.34 | 516719.77 | 8533533.70 | 19.57  | -10.36 |
| 8 | 516982.14 | 8536629.97 | 516977.00 | 8536631.07 | 5.14   | -1.10  |
| 8 | 520366.21 | 8536605.80 | 520364.13 | 8536607.93 | 2.08   | -2.13  |
| 8 | 516093.44 | 8530059.68 | 516062.45 | 8530068.82 | 30.99  | -9.14  |
| 8 | 524336.46 | 8529839.42 | 524337.81 | 8529830.94 | -1.35  | 8.48   |
| 8 | 524209.29 | 8539555.07 | 524204.33 | 8539562.46 | 4.97   | -7.39  |
| 8 | 520266.83 | 8532793.85 | 520252.08 | 8532794.69 | 14.76  | -0.84  |
| 8 | 521636.75 | 8532786.02 | 521631.81 | 8532787.73 | 4.94   | -1.71  |
| 8 | 519715.98 | 8539708.62 | 519708.06 | 8539707.83 | 7.93   | 0.80   |
| 8 | 519716.07 | 8539600.90 | 519706.57 | 8539611.37 | 9.50   | -10.47 |
| 8 | 521040.28 | 8530297.09 | 521030.85 | 8530288.57 | 9.43   | 8.52   |
| 8 | 522888.8  | 8532928.06 | 522891.04 | 8532929.50 | -2.24  | -1.43  |
| 8 | 524485.53 | 8540112.71 | 524495.89 | 8540130.00 | -10.36 | -17.29 |
| 8 | 522254.85 | 8540065.09 | 522246.65 | 8540070.19 | 8.20   | -5.09  |
| 8 | 520160.14 | 8537365.99 | 520158.65 | 8537372.05 | 1.49   | -6.06  |
| 8 | 521223.61 | 8533641.4  | 521219.88 | 8533646.02 | 3.73   | -4.62  |
| 8 | 523781.9  | 8535844.17 | 523790.64 | 8535852.73 | -8.74  | -8.56  |
| 8 | 528518.04 | 8537450.61 | 528537.79 | 8537441.96 | -19.75 | 8.65   |
| 8 | 529342.5  | 8538375.92 | 529358.41 | 8538364.79 | -15.90 | 11.13  |
| 8 | 527064.63 | 8539519.07 | 527076.18 | 8539528.31 | -11.55 | -9.25  |
| 8 | 527885.5  | 8538594.50 | 527900.39 | 8538594.99 | -14.89 | -0.49  |
| 8 | 528977.6  | 8538258.03 | 528998.58 | 8538250.33 | -20.98 | 7.70   |
| 8 | 527422.21 | 8538597.21 | 527433.70 | 8538595.42 | -11.49 | 1.79   |
| 8 | 529144.24 | 8535161.72 | 529161.73 | 8535152.96 | -17.50 | 8.76   |
| 8 | 529489.2  | 8530359.41 | 529502.59 | 8530350.82 | -13.39 | 8.59   |
| 8 | 531235.32 | 8530383.52 | 531252.11 | 8530368.78 | -16.79 | 14.74  |
| 8 | 531207.1  | 8531785.54 | 531227.94 | 8531773.69 | -20.84 | 11.85  |
| 8 | 531691.51 | 8533240.39 | 531713.58 | 8533224.93 | -22.07 | 15.46  |
| 8 | 530254.62 | 8530460.61 | 530255.22 | 8530441.22 | -0.60  | 19.39  |

|   |           |            |           |            |        |        |
|---|-----------|------------|-----------|------------|--------|--------|
| 8 | 528365.86 | 8534776.52 | 528381.31 | 8534766.84 | -15.45 | 9.68   |
| 8 | 528273.53 | 8533965.85 | 528289.85 | 8533953.26 | -16.32 | 12.58  |
| 8 | 530647.03 | 8538944.58 | 530679.05 | 8538933.57 | -32.02 | 11.01  |
| 8 | 528607.53 | 8539818.09 | 528627.46 | 8539815.66 | -19.93 | 2.43   |
| 8 | 528632.38 | 8539352.71 | 528654.35 | 8539351.88 | -21.98 | 0.82   |
| 8 | 528813.43 | 8538111.34 | 528823.59 | 8538106.74 | -10.16 | 4.60   |
| 8 | 529507.99 | 8538386.94 | 529530.08 | 8538378.73 | -22.09 | 8.20   |
| 8 | 526192.71 | 8535345.65 | 526196.92 | 8535344.5  | -4.21  | 1.15   |
| 8 | 527640.11 | 8536604.21 | 527646.41 | 8536596.97 | -6.30  | 7.25   |
| 8 | 528571.42 | 8537062.75 | 528589.03 | 8537054.98 | -17.61 | 7.78   |
| 8 | 527043.43 | 8535039.14 | 527056.94 | 8535036.20 | -13.51 | 2.94   |
| 8 | 524209.29 | 8539555.07 | 524204.33 | 8539562.46 | 4.97   | -7.39  |
| 8 | 520995.65 | 8534178.3  | 520994.96 | 8534181.96 | 0.69   | -3.66  |
| 8 | 525650.83 | 8537382.04 | 525656.09 | 8537379.66 | -5.26  | 2.38   |
| 8 | 525019.88 | 8538164.58 | 525012.14 | 8538169.03 | 7.74   | -4.45  |
| 8 | 519693.21 | 8534506.79 | 519688.14 | 8534510.77 | 5.07   | -3.98  |
| 8 | 524951.42 | 8532945.76 | 524954.77 | 8532939.05 | -3.35  | 6.71   |
| 8 | 523325.78 | 8533641.9  | 523327.76 | 8533647.87 | -1.98  | -5.97  |
| 8 | 519025.59 | 8532687.61 | 519007.75 | 8532697.34 | 17.84  | -9.73  |
| 8 | 519981.01 | 8531451.16 | 519963.11 | 8531452.20 | 17.91  | -1.04  |
| 8 | 520398.5  | 8530502.48 | 520384.8  | 8530502.06 | 13.71  | 0.42   |
| 8 | 519944.64 | 8538858.86 | 519936.63 | 8538862.40 | 8.01   | -3.53  |
| 8 | 520055.25 | 8537992.48 | 520046.45 | 8537994.34 | 8.80   | -1.86  |
| 8 | 518936.57 | 8537155.31 | 518934.54 | 8537157.40 | 2.03   | -2.09  |
| 8 | 520728.21 | 8535588.85 | 520727.31 | 8535592.26 | 0.90   | -3.41  |
| 8 | 524336.46 | 8529839.42 | 524337.81 | 8529830.94 | -1.35  | 8.48   |
| 8 | 524078.93 | 8530693.6  | 524081.45 | 8530681.61 | -2.52  | 11.99  |
| 8 | 523925.88 | 8531288.86 | 523929.88 | 8531283.86 | -4.00  | 5.00   |
| 8 | 518207.59 | 8533793.14 | 518198.49 | 8533796.11 | 9.10   | -2.98  |
| 8 | 519367.33 | 8535952.59 | 519363.49 | 8535954.29 | 3.84   | -1.70  |
| 8 | 521406.09 | 8531550.64 | 521401.75 | 8531548.30 | 4.34   | 2.34   |
| 8 | 531337.33 | 8532074.59 | 531361.39 | 8532064.28 | -24.06 | 10.31  |
| 8 | 524876.26 | 8535636.46 | 524876.59 | 8535635.93 | -0.33  | 0.53   |
| 8 | 528676.34 | 8535676.88 | 528696.57 | 8535668.02 | -20.23 | 8.86   |
| 8 | 526922.32 | 8535546.58 | 526922.78 | 8535548.10 | -0.46  | -1.52  |
| 8 | 527640.92 | 8535180.30 | 527654.10 | 8535172.52 | -13.18 | 7.78   |
| 8 | 530008.62 | 8536351.83 | 530031.18 | 8536345.66 | -22.56 | 6.17   |
| 8 | 529678.75 | 8535691.19 | 529694.84 | 8535682.34 | -16.09 | 8.85   |
| 8 | 528589.55 | 8532873.52 | 528604.51 | 8532857.37 | -14.96 | 16.15  |
| 8 | 529825.81 | 8532682.23 | 529849.82 | 8532671.9  | -24.01 | 10.33  |
| 8 | 527587.46 | 8539570.06 | 527606.48 | 8539582.15 | -19.02 | -12.09 |
| 8 | 528508.87 | 8533423.98 | 528524.95 | 8533410.74 | -16.07 | 13.24  |
| 8 | 530777.72 | 8536043.44 | 530806.8  | 8536028.90 | -29.08 | 14.55  |
| 8 | 529491.31 | 8536541.27 | 529514.33 | 8536528.96 | -23.02 | 12.32  |
| 8 | 526938.07 | 8538178.27 | 526939.85 | 8538164.83 | -1.78  | 13.44  |
| 8 | 527618.5  | 8537495.65 | 527626.47 | 8537487.91 | -7.97  | 7.74   |

|   |           |            |           |            |        |        |
|---|-----------|------------|-----------|------------|--------|--------|
| 8 | 527120.59 | 8539346.51 | 527132.44 | 8539357.32 | -11.85 | -10.82 |
| 8 | 528755.2  | 8535995.97 | 528773.21 | 8535983.88 | -18.01 | 12.09  |
| 8 | 528576.89 | 8536596.4  | 528594.09 | 8536584.73 | -17.20 | 11.67  |
| 9 | 541868.05 | 8539328.26 | 541859.78 | 8539351.89 | 8.27   | -23.62 |
| 9 | 543834.12 | 8536377.58 | 543845.72 | 8536371.55 | -11.60 | 6.03   |
| 9 | 543427.01 | 8531809.72 | 543438.31 | 8531795.37 | -11.30 | 14.35  |
| 9 | 542316.69 | 8533939.01 | 542322.43 | 8533935.68 | -5.74  | 3.33   |
| 9 | 538469.04 | 8536646.22 | 538455.99 | 8536648.14 | 13.05  | -1.92  |
| 9 | 537302.94 | 8538687.06 | 537291.93 | 8538684.91 | 11.01  | 2.15   |
| 9 | 537712.85 | 8539278.26 | 537693.32 | 8539280.47 | 19.53  | -2.21  |
| 9 | 535751.8  | 8537327.04 | 535727.89 | 8537331.74 | 23.91  | -4.70  |
| 9 | 536029.36 | 8535853.61 | 536014.61 | 8535860.74 | 14.75  | -7.13  |
| 9 | 537453.32 | 8534754.27 | 537434.31 | 8534742.12 | 19.01  | 12.15  |
| 9 | 540559.1  | 8532523.37 | 540561.96 | 8532517.91 | -2.86  | 5.46   |
| 9 | 541141.07 | 8532390.48 | 541153.37 | 8532369.80 | -12.30 | 20.68  |
| 9 | 539924.3  | 8530150.46 | 539918.52 | 8530133.78 | 5.78   | 16.68  |
| 9 | 541458.91 | 8529947.46 | 541462.63 | 8529932.18 | -3.72  | 15.28  |
| 9 | 536970.86 | 8532455.34 | 536957.74 | 8532448.19 | 13.12  | 7.15   |
| 9 | 537326.15 | 8530806.63 | 537313.36 | 8530787.04 | 12.79  | 19.59  |
| 9 | 536886.25 | 8531632.09 | 536875.69 | 8531619.61 | 10.56  | 12.48  |
| 9 | 532604.23 | 8530127.77 | 532572.82 | 8530116.39 | 31.41  | 11.38  |
| 9 | 538304.04 | 8537214.43 | 538289.09 | 8537209.89 | 14.95  | 4.54   |
| 9 | 532085.5  | 8533720.66 | 532062.76 | 8533706.95 | 22.73  | 13.71  |
| 9 | 541337.64 | 8529945.03 | 541336.35 | 8529931.74 | 1.29   | 13.29  |
| 9 | 540863.67 | 8536772.83 | 540863.97 | 8536764.27 | -0.30  | 8.56   |
| 9 | 537816.1  | 8535196.26 | 537790.09 | 8535193.41 | 26.01  | 2.85   |
| 9 | 543057.68 | 8532391.28 | 543065.74 | 8532385.66 | -8.06  | 5.62   |
| 9 | 545788.17 | 8537371.89 | 545817.94 | 8537379.43 | -29.77 | -7.54  |
| 9 | 545167.39 | 8537297.48 | 545178.12 | 8537295.54 | -10.73 | 1.94   |
| 9 | 537564.91 | 8537923.41 | 537548.71 | 8537917.68 | 16.20  | 5.73   |
| 9 | 538281.19 | 8536582.69 | 538269.42 | 8536588.79 | 11.76  | -6.10  |
| 9 | 538573.67 | 8529881.11 | 538561.56 | 8529866.18 | 12.11  | 14.93  |
| 9 | 533671.84 | 8530598.95 | 533651.44 | 8530583.91 | 20.40  | 15.04  |
| 9 | 538304.04 | 8537214.43 | 538289.09 | 8537209.89 | 14.95  | 4.54   |
| 9 | 541337.64 | 8529945.03 | 541336.35 | 8529931.74 | 1.29   | 13.29  |
| 9 | 537564.91 | 8537923.41 | 537548.71 | 8537917.68 | 16.20  | 5.73   |
| 9 | 538281.19 | 8536582.69 | 538269.42 | 8536588.79 | 11.76  | -6.10  |
| 9 | 545494.72 | 8533197.99 | 545518.17 | 8533190.39 | -23.45 | 7.60   |
| 9 | 532468.1  | 8532691.33 | 532458.88 | 8532689.45 | 9.22   | 1.88   |
| 9 | 534960.16 | 8539249.91 | 534937.26 | 8539244.67 | 22.90  | 5.24   |
| 9 | 537616.88 | 8539194.95 | 537587.35 | 8539206.26 | 29.53  | -11.31 |
| 9 | 535543.06 | 8537632.22 | 535525.61 | 8537636.17 | 17.45  | -3.95  |
| 9 | 536460.32 | 8536756.63 | 536434.25 | 8536762.32 | 26.07  | -5.69  |
| 9 | 536584.99 | 8536230.99 | 536568.16 | 8536234.39 | 16.83  | -3.40  |
| 9 | 537776.83 | 8537161.17 | 537763.62 | 8537170.24 | 13.21  | -9.07  |
| 9 | 539046.01 | 8535626.17 | 539034.67 | 8535631.17 | 11.34  | -5.00  |

|    |           |            |           |            |        |        |
|----|-----------|------------|-----------|------------|--------|--------|
| 9  | 539956.29 | 8533605.98 | 539958.8  | 8533600.54 | -2.51  | 5.44   |
| 9  | 540566.49 | 8532733.97 | 540570.35 | 8532727.51 | -3.86  | 6.46   |
| 9  | 538540.36 | 8530734.36 | 538535.44 | 8530720.15 | 4.92   | 14.21  |
| 9  | 539535.86 | 8531090.99 | 539530.93 | 8531080.95 | 4.93   | 10.04  |
| 9  | 540182.79 | 8531606.1  | 540184.26 | 8531595.33 | -1.47  | 10.77  |
| 9  | 540607.84 | 8529925.85 | 540607.67 | 8529917.46 | 0.17   | 8.39   |
| 9  | 543574.80 | 8531426.35 | 543584.10 | 8531412.00 | -9.30  | 14.35  |
| 9  | 542715.50 | 8533285.80 | 542732.03 | 8533275.60 | -16.53 | 10.20  |
| 9  | 541724.38 | 8535308.85 | 541726.02 | 8535307.76 | -1.64  | 1.09   |
| 9  | 542788.93 | 8536899.77 | 542796.01 | 8536902.31 | -7.08  | -2.54  |
| 9  | 542832.32 | 8539299.22 | 542835.65 | 8539297.50 | -3.33  | 1.72   |
| 9  | 545452.56 | 8539425.36 | 545486.97 | 8539425.16 | -34.41 | 0.20   |
| 9  | 544192.59 | 8537677.62 | 544210.11 | 8537694.98 | -17.52 | -17.36 |
| 9  | 537453.71 | 8539481.31 | 537432.77 | 8539479.74 | 20.94  | 1.57   |
| 9  | 539474.44 | 8534582.76 | 539467.37 | 8534579.95 | 7.07   | 2.81   |
| 9  | 537116.53 | 8534447.16 | 537095.69 | 8534445.67 | 20.84  | 1.49   |
| 9  | 538845.24 | 8535445.31 | 538839.06 | 8535446.98 | 6.18   | -1.67  |
| 9  | 538368.62 | 8535785.25 | 538357.88 | 8535779.77 | 10.74  | 5.48   |
| 9  | 546160.44 | 8534771.16 | 546178.38 | 8534769.31 | -17.94 | 1.85   |
| 10 | 529708.81 | 8520357.64 | 529712.78 | 8520339.7  | -3.97  | 17.94  |
| 10 | 529127.89 | 8522964.89 | 529128.39 | 8522963.73 | -0.50  | 1.16   |
| 10 | 530058.68 | 8522637.22 | 530068.49 | 8522625.26 | -9.81  | 11.96  |
| 10 | 531103.26 | 8522659.4  | 531111.63 | 8522653.91 | -8.37  | 5.49   |
| 10 | 530998.88 | 8523976.32 | 531008.11 | 8523972.03 | -9.23  | 4.29   |
| 10 | 530392.6  | 8525387.86 | 530402.22 | 8525382.79 | -9.62  | 5.07   |
| 10 | 530720.14 | 8525462.90 | 530724.21 | 8525456.16 | -4.07  | 6.74   |
| 10 | 530871.49 | 8525605.73 | 530874.66 | 8525599.97 | -3.18  | 5.76   |
| 10 | 531140.14 | 8525936.11 | 531150.03 | 8525940.77 | -9.89  | -4.66  |
| 10 | 530056.21 | 8526282.88 | 530061.63 | 8526279.18 | -5.43  | 3.70   |
| 10 | 530498.86 | 8527063.04 | 530505.16 | 8527047.64 | -6.29  | 15.41  |
| 10 | 530594.5  | 8527343.16 | 530602.13 | 8527342.84 | -7.63  | 0.32   |
| 10 | 530191.27 | 8521328.02 | 530197.37 | 8521311.58 | -6.10  | 16.44  |
| 10 | 531841.54 | 8523241.35 | 531854.32 | 8523223.45 | -12.78 | 17.90  |
| 10 | 530983.31 | 8527794.49 | 530995.08 | 8527799.61 | -11.77 | -5.12  |
| 10 | 531330.96 | 8524562.34 | 531338.87 | 8524557.7  | -7.91  | 4.64   |
| 10 | 531321.08 | 8523413.33 | 531330.14 | 8523405.63 | -9.06  | 7.70   |
| 10 | 525111.88 | 8526390.69 | 525108.4  | 8526376.49 | 3.48   | 14.20  |
| 10 | 523588.89 | 8523475.63 | 523572.15 | 8523461.36 | 16.74  | 14.27  |
| 10 | 523366.75 | 8523650.53 | 523358.00 | 8523652.8  | 8.75   | -2.27  |
| 10 | 524519.43 | 8522975.42 | 524507.08 | 8523000.11 | 12.35  | -24.69 |
| 10 | 525158.63 | 8525553.92 | 525151.46 | 8525550.38 | 7.17   | 3.54   |
| 10 | 525932.48 | 8527194.15 | 525922.51 | 8527196.97 | 9.97   | -2.81  |
| 10 | 525799.42 | 8527623.01 | 525797.98 | 8527600.27 | 1.44   | 22.74  |
| 10 | 526221.21 | 8528343.85 | 526210.05 | 8528342.17 | 11.16  | 1.69   |
| 10 | 525611.38 | 8528786.11 | 525604.97 | 8528782.21 | 6.41   | 3.91   |
| 10 | 524355.18 | 8529806.08 | 524341.51 | 8529806.76 | 13.68  | -0.68  |

|    |           |            |           |            |       |       |
|----|-----------|------------|-----------|------------|-------|-------|
| 10 | 521433.29 | 8529323.87 | 521417.65 | 8529332.5  | 15.64 | -8.63 |
| 10 | 524565.00 | 8524145.92 | 524548.64 | 8524132.69 | 16.36 | 13.23 |
| 10 | 524530.70 | 8522429.61 | 524522.77 | 8522410.24 | 7.92  | 19.37 |
| 10 | 517202.26 | 8529467.34 | 517202.10 | 8529470.3  | 0.16  | -2.96 |
| 10 | 524375.91 | 8528904.29 | 524357.45 | 8528901.14 | 18.46 | 3.15  |
| 10 | 524606.85 | 8528289.08 | 524589.15 | 8528288.96 | 17.70 | 0.12  |
| 10 | 524627.67 | 8527883.45 | 524616.12 | 8527892.5  | 11.54 | -9.05 |
| 10 | 522121.57 | 8528422.62 | 522117.80 | 8528427.27 | 3.76  | -4.65 |
